1 **The Cuon Enigma: Genome survey and comparative genomics of the endangered Dhole**

2 (*Cuon alpinus*)

3

4 Bilal Habib<sup>1\*</sup>, Pallavi Ghaskadbi<sup>1\*</sup>, Parag Nigam<sup>1\*</sup>, Shrushti Modi<sup>1\*</sup>, Peddamma Sathish

5 Kumar<sup>2</sup>, Kanika Sharma<sup>2</sup>, Vidhya Singh<sup>2</sup>, Bipin Kumar<sup>2</sup>, Abhishek Tripathi<sup>2</sup>, Harish

6 Kothandaraman<sup>2\*</sup>, Sailu Yellaboina<sup>2\*</sup>, Dushyant Singh Baghel<sup>2\*</sup>, Samrat Mondol<sup>1\*</sup>

7

8 <sup>1</sup> Wildlife Institute of India, Chandrabani, Dehradun, India-248001

9 <sup>2</sup> Nucleome Informatics Private Limited, Genome Block, Miyapur, Hyderabad, India-500049

10

11 **Corresponding author:**

12

13 Bilal Habib

14 Scientist E

15 Department of Animal Ecology and Conservation Biology

16 Wildlife Institute of India, Chandrabani, Dehradun, India 248001

17 Tel: 00 91 135 2646283

18 Email: [bh@wii.gov.in](mailto:bh@wii.gov.in)

19

20 \* Equal contributions

21

22

23

24

25

26

27

28

29

30

31

32

33

34

35 **Abstract**

36 The Asiatic wild dog is an endangered monophyletic canid restricted to Asia; facing threats  
37 from habitat fragmentation and other anthropogenic factors. Dholes have unique adaptations  
38 as compared to other wolf-like canids for large litter size (larger number of mammae) and  
39 hypercarnivory making it evolutionarily notable. Over evolutionary time, dhole and the  
40 subsequent divergent wild canids have lost coat patterns found in African wild dog. Here we  
41 report the first high coverage genome survey of Asiatic wild dog and mapped it with African  
42 wild dog, dingo and domestic dog to assess the structural variants. We generated a total of  
43 124.8 Gb data from 416140921 raw read pairs and retained 398659457 reads with 52X  
44 coverage and mapped 99.16% of the clean reads to the three reference genomes. We  
45 identified ~13553269 SNV's, ~2858184 InDels, ~41000 SVs, ~1854109 SSRs and about  
46 1000 CNVs. We compared the annotated genome of dingo and domestic dog with dhole  
47 genome sequence to understand the role of genes responsible in pelage pattern, dentition and  
48 mammary glands. Positively selected genes for these phenotypes were looked for SNP  
49 variants and top ranked genes for coat pattern, dentition and mammary glands were found to  
50 play a role in signalling and developmental pathways. Mitochondrial genome assembly  
51 predicted 35 genes, 11 CDS and 24 tRNA. This genome information will help in  
52 understanding the divergence of two monophyletic canids, *Cuon* and *Lycaon*, and the  
53 evolutionary adaptations of dholes with respect to other canids.

54

55

56

57

58

## 59 **Introduction**

60 The Asiatic wild dog (*Cuon alpinus*) or dhole is monotypic canid belonging to the genus  
61 Cuon. Dholes were widely distributed across the continents of North America, Europe and  
62 Asia during the Pleistocene era (Cohen, 1978), but are now restricted to parts of South, East  
63 and Southeast Asia (Kamler et al. 2015). Threats like habitat loss, diseases from domestic  
64 dogs, persecutions and interspecific competition among large co-predators (Durbin et al.  
65 2004) have resulted in a 75% decline of the historic range of dholes (Kamler et al. 2015). The  
66 remnant populations of dholes in Asia are highly fragmented (Burton 1940, Durbin et al  
67 2004, Karanth and Sunquist 2000) with a decreasing population trend placing them under the  
68 ‘Endangered’ category of the IUCN (category C2a(i)) (Kamler et al. 2015) and ‘Appendix II’  
69 of the Convention on International Trade in Endangered Species (CITES). The Indian  
70 subcontinent currently harbours majority of the wild dhole populations across its range  
71 (Kamler et al. 2015), where the species has experienced about 60% habitat decline (Karanth  
72 et al. 2010). The dense forests of Western Ghats and central India retain most of the dhole  
73 population (Karanth et al. 2009) while the Eastern Ghats landscape, northeast India and  
74 Himalayan region hold smaller populations (Karanth et al. 2009, Lyngdoh et al. 2014, Bashir  
75 et al. 2014).

76 Ecologically, dhole is the only social canid in closed forest systems across their range. In  
77 India, dhole shares habitat with larger co-predators like tigers and leopards (Karanth and  
78 Sunquist 2000). In spite of smaller body size, their group living and pack-hunting strategies  
79 help them survive intense intraguild competition (Wang and Macdonald 2009; Steinmetz et  
80 al. 2013). Dholes are popularly known as ‘whistling hunters’ due to the use of whistles as a  
81 unique mode of communication among large packs (Fox 1984). They also have other  
82 specialized communication mechanisms such as varied scent-marking behaviours which

83 include cross-marking ritual by dominant males and females- a form of mate guarding, body-  
84 rubs and hand-stand scent marking (Ghaskadbi et al. 2016).

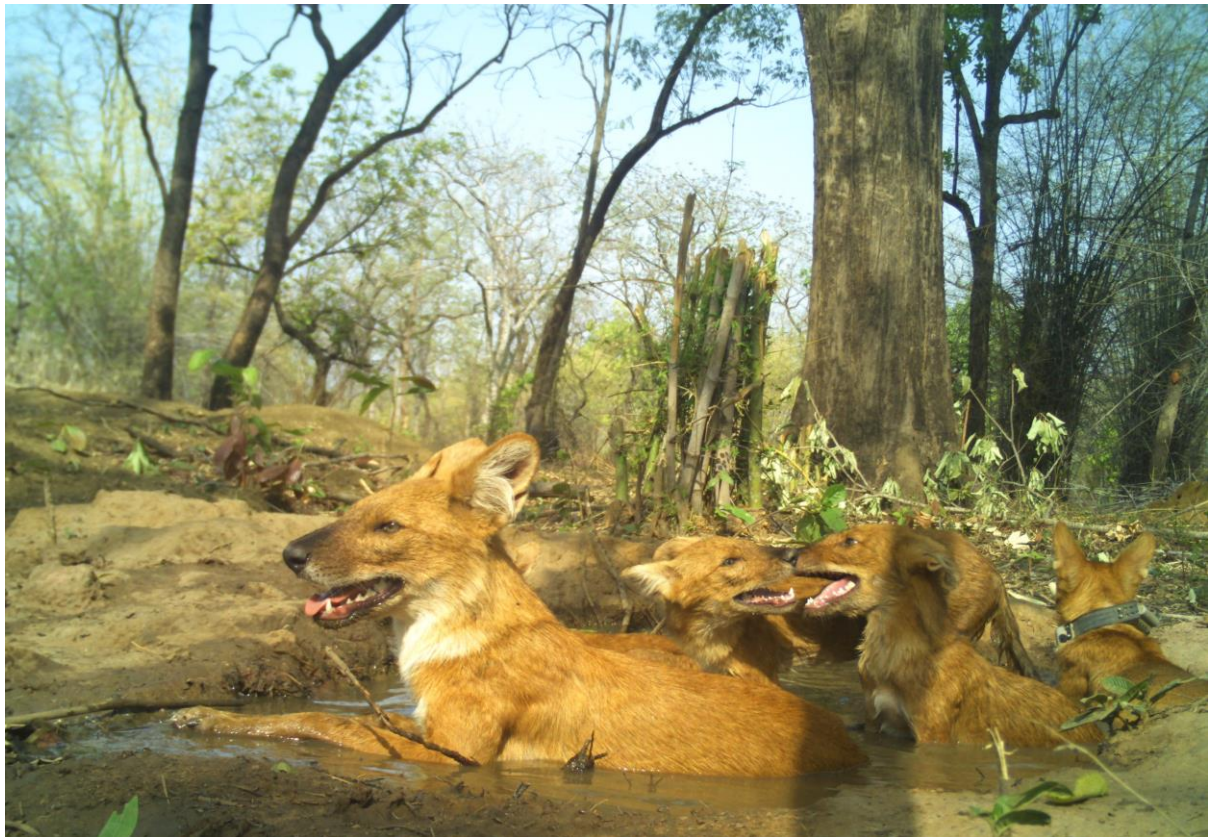

85  
86 Evolutionarily, dholes are grouped with other wolf-like canids (Gray wolf, coyote and  
87 Ethiopian wolf) (Wayne et al. 1997) and diverged within this group approximately 4-6  
88 million years ago after the African wild dog (Lindblad-Toh et al. 2005). Both species evolved  
89 with a distinctly structured unicuspid talonid on the lower carnassial for enhanced meat-  
90 shearing capacity (Van Valkenburgh, 1991) and 6-7 pairs of mammae, possibly for parental  
91 care of large litter size (Burton, 1940). However, dhole and the subsequent divergent wild  
92 species in this clade (Ethiopian wolf, coyote, gray wolf, golden jackal, black-backed jackal  
93 and side-striped jackal) have lost the characteristic pelage pattern that is only present in  
94 African wild dog. All the above species-specific unique adaptations of dholes make them an  
95 evolutionary enigma. Given the current anthropogenic pressures, the survival of this

96 monotypic genus depends on an integrated approach of conservation measures involving  
97 detailed information on ecology, demography and genetics.

98 In this paper, we report the first genome survey of wild-ranging Asiatic wild dog, where we  
99 mapped it against the closely related African wild dog (*Lycaon pictus*), dingo (*Canis lupus*  
100 *dingo*) and domestic dog (*Canis familiaris*). Further, we describe dhole genome structural  
101 variants, copy number variants, and simple sequence repeats and conduct mitochondrial  
102 genome assembly and annotation. Finally, we also explore dhole-specific variations in coat  
103 colour, dentition and mammary gland gene complexes. This genomic data would help in  
104 future studies on dhole evolution and demographic history.

## 105 **Methods**

### 106 ***Sample collection, permits and ethical considerations***

107 As part of an ongoing study in the Tadoba Andhari Tiger Reserve (Permit No. D-  
108 22(8)/WL/Research/CT-722/(12-13)/2934/2013:), five free-ranging dholes were captured  
109 from the wild and radio-collared for intensive monitoring (Permit No. SPP-12/2016 and SPP-  
110 22/2017). Out of the five individuals, the blood sample of one adult male was used for  
111 genome sequencing. The dholes were highly social and active making them difficult targets  
112 to capture in wild. We immobilized the target individuals using Zoletil (Zoletil 100; Virbac,  
113 Carros, France) (Sawas et al. 2005). The samples were stored in EDTA vacutainers at -20 °C  
114 for further analysis.

### 115 ***Library construction, sequencing and filtering***

116 Genomic DNA was extracted from the blood sample with Nucleospin Blood Kit  
117 (MACHAREY-NAGEL GmbH & Co. KG, Duren, Germany). Lysis was performed with  
118 200µl of lysis buffer (B3), 25µl of Proteinase K for 200µl of blood, followed by the



119 manufacturer's protocol provided in the kit. DNA was eluted with 100  $\mu$ l of 1X TE, and  
120 stored at -20  $^{\circ}$ C for further analysis.

121 Paired end libraries were constructed using NEBNext<sup>®</sup> UltraTM DNA Library Prep Kit for  
122 Illumina<sup>®</sup> following manufacturer's protocols. These libraries were prepared with insert size  
123 of 300bp and 500bp using 1  $\mu$ g of initial genomic DNA. The PCR products were purified to  
124 optimize the size of the fragments using AMPure XP system, and fragments were selected  
125 based on size using Agilent 2100 Bioanalyzer. Each insert library was run in multiple lanes  
126 using an Illumina HiSeq 2500 till optimal coverage for analysis was achieved. We generated  
127 a total of 124.8 Gb data from 416140921 raw read pairs, leading to approximately 52x  
128 coverage based on a genome size estimation of roughly 2.4 Gb. We trimmed the low-quality  
129 bases from both the sides using Trimmomatic v 0.36 (Bolger et al. 2014) to improve read  
130 quality and retained a final data of 398659457 read pairs, providing about 95.7% coverage.

### 131 ***Comparative mapping with members of Family Canidae***

132 The final selected reads of the dhole genome were compared with available genomes of  
133 domestic dog (*Canis familiaris*), African wild dog (*Lycaon pictus*) and dingo (*Canis lupus*  
134 *dingo*). Their genome information was downloaded from NCBI (Table 1). The reference  
135 genomes were indexed using Burrows-Wheeler Aligner (BWA) v 0.7.17 (Li et al. 2010) and  
136 the raw reads of dhole genome were aligned against the reference genomes using default  
137 parameters of BWA MEM module. The alignments from BWA MEM were streamed into  
138 SAMBLASTER v0.1.24 (Faust and Hall 2014) to exclude duplicates, add mated read tags  
139 and to separate out discordant, split read alignments using default parameters. The discordant  
140 and split read alignment sam files were converted into bam format using samtools 1.7. The  
141 mated alignments were then passed through Sambamba v0.6.6 (Tarasov et al. 2015) in order  
142 to sort and merge the alignments from the two libraries.

143 **Table 1:** Statistics of the reference genomes of other species used for comparative mapping  
144 of Asiatic Dhole Genome

| Species                                      | Accession no.                 | GenBank PMID   | No. of Scaffolds | Genome length (Mb) |
|----------------------------------------------|-------------------------------|----------------|------------------|--------------------|
| Dingo<br>( <i>Canis lupus dingo</i> )        | GCF_003254725.1               | QKWQ00000000.1 | 2,444            | 2,439              |
| Domestic dog<br>( <i>Canis familiaris</i> )  | GCF_000002285.3               | AAEX00000000.3 | 3,310            | 2,410              |
| African wild dog<br>( <i>Lycaon pictus</i> ) | GCA_001887905.1_LycPicSAfr1.0 | LPRB00000000.1 | 803              | 2,358              |

145 ***Identification of SNPs and InDels***

146 FreeBayes v1.1.0-46 (Garrison & Marth 2012) with parallel implementation was used to  
147 identify the SNPs and indels. We used stringent base and mapping quality filters as per  
148 FreeBayes standard option, where -m option sets the mapping quality and -q sets the Phred  
149 scaled base quality to exclude alleles if the supporting base quality is less than 10. Minimum  
150 haplotype length of 5 bases was taken to allow continuous matches and to improve the  
151 variant calling process. The variants were emitted in a VCF compliant format and then  
152 filtered using bcftools filter module v1.8 based on a minimal read depth of 10, minimum  
153 quality of 30 and a maximal read depth as recommended by Li (2014).

154 The variant annotations were done using snpEff v4.3 in case of variants identified using  
155 domestic dog and dingo as reference genomes. The variants called against the African wild  
156 dog were not annotated, since there is no available genome annotation.

157 ***Identification of Structural and Copy Number Variants***

158 To determine the structural and copy number variants we used the combined approach  
159 including both read pair and read count algorithm (Tattini et al. 2015). The variants were  
160 mined using lumpypexpress in LUMPY v 0.2.13 (Layer et al. 2014) to identify intra-  
161 chromosomal translocations (BND), inversions (INV), deletions (DEL) and insertions (INS)

162 with probability curve. To perform the analysis we used the concordant sorted alignments,  
163 split and discordant bam files derived from mapping to the reference genome. The filtering  
164 was done depending on the variant depth. Structural variants were only considered if the  
165 locus was supported by a minimum depth of 12x reads using bcftools filter option

166 The copy number variants were obtained using CNVnator's with docker image  
167 'mustxyk/ubuntu-cnvator' from 0.3.2 version of the tool (Abyzov et al. 2011). We used the  
168 "--unique" option in order to obtain "q0" score of the calls as per author's recommendation.  
169 The entire process used a window size of 1000 bases to identify the variants, which were later  
170 filtered by taking the "q0" scores between 0-0.5. The annotations for the filtered variants  
171 were done separately by the R package intanSV.

### 172 *Identification of Simple Sequence Repeats*

173 Consensus sequence based on the Domestic Dog genome was created using bcftools  
174 consensus by putting back the filtered SNVs and InDels. The consensus genome was further  
175 searched for mono, di, tri, tetra, penta and hexa nucleotide repeats using PERF v0.2.5  
176 (Avvaru et al. 2017) and MISA. The minimum length of the repeats was fixed at 12 bases as  
177 recommended by Subramanian et al. (2003). The repeat search conditions are provided in  
178 Table 2. The repeat motifs were intersected using bedtools intersect with a reciprocal match  
179 of 75% to call the SSRs concordant amongst the two tools.

180 **Table 2:** Motif unit and repeat length cut-offs

| Motif Unit size | Minimum Repeat | Motif Unit Length |
|-----------------|----------------|-------------------|
| Mono            | 12             | 12                |
| Di              | 6              | 12                |
| Tri             | 4              | 12                |
| Tetra           | 3              | 12                |
| Penta           | 3              | 15                |
| Hexa            | 2              | 12                |
| Total           | -              | -                 |

181



## 182 ***Comparative mapping with dingo and dog for specific genes***

183 To understand the peculiar differences in the dentition, coat colour and mammary glands in  
184 dholes we identified and compared the phenotypic genes using human and mouse as models  
185 with domestic dog and dingo. We transferred the phenotype to gene mapping from mouse  
186 and human to domestic dog and dingo based on orthologous relationship.

187 We obtained the existing orthology information between model organisms (human and  
188 mouse) and canines (dog and dingo) from ENSEMBL Biomart (Zerbino et al. 2018) and  
189 OMA orthology database (Altenhoff et al. 2018). The orthology information between model  
190 organisms and dhole were identified using bi-directional best PLAST (Parallel Local  
191 Sequence Alignment Search Tool) hit based on PLAST search (Nguyen et al. 2009). The  
192 protein sequences of mouse, human, dog, and dhole for PLAST search were obtained from  
193 ENSEMBL 2018 (Zerbino et al. 2018) and reference sequence database (RefSeq) at NCBI  
194 (O’leary et al. 2016) respectively.

195 Phenotype to gene mapping in human and mouse were obtained from mouse (Bello et al.  
196 2015) and human phenotype ontology (Robinson et al. 2008), respectively. The gene  
197 ontology information for domestic dog was obtained from dog gene ontology ENSEMBL  
198 (Zerbino et al. 2018). The phenotypes to gene mapping related to coat colour, dentition and  
199 mammary gland function were transferred from reference model organisms (human and  
200 mouse) to domestic dog and dingo based on orthology relationship. We also mapped the gene  
201 ontology functions related to mammary gland function and development from domestic dog  
202 to dingo based on orthology relationship. In addition to that the known genes responsible for  
203 coat colour and dentition patterns in canines were obtained from the literature (Campana et  
204 al. 2016; Jernvall et al. 2012).

## 205 ***Mitochondrial Genome Assembly***

206 The reads mapping to the mitochondrial sequences from dingo, domestic dog and African  
207 wild dog genomes were extracted using samtools bam2fastq command. These reads were  
208 then error-corrected and assembled using SPAdes v3.11.1 (Bankevich et al. 2012) using the  
209 auto-multi-kmer mode.

## 210 **Results**

### 211 *Variant calling across the reference genomes*

212 From the 124.8 Gb data generated during dhole sequencing, we retained 398659457 reads  
213 after trimming low quality bases, adapters and discarding low quality sequences. In this data  
214 99.16% of the clean reads were successfully mapped to the three reference genomes. We  
215 mined SNV, indels, structural and copy-number variant data and found ~13553269 SNV's,  
216 ~2858184 indels, ~41000 SVs and finally about 1000 CNV in genomes of dhole, dingo and  
217 dog. Detailed statistics are tabulated in Figure 1 for all types of variants. From the many  
218 genes hosting the variants, we primarily looked at genes involved in dentition, pelage and  
219 mammary glands.

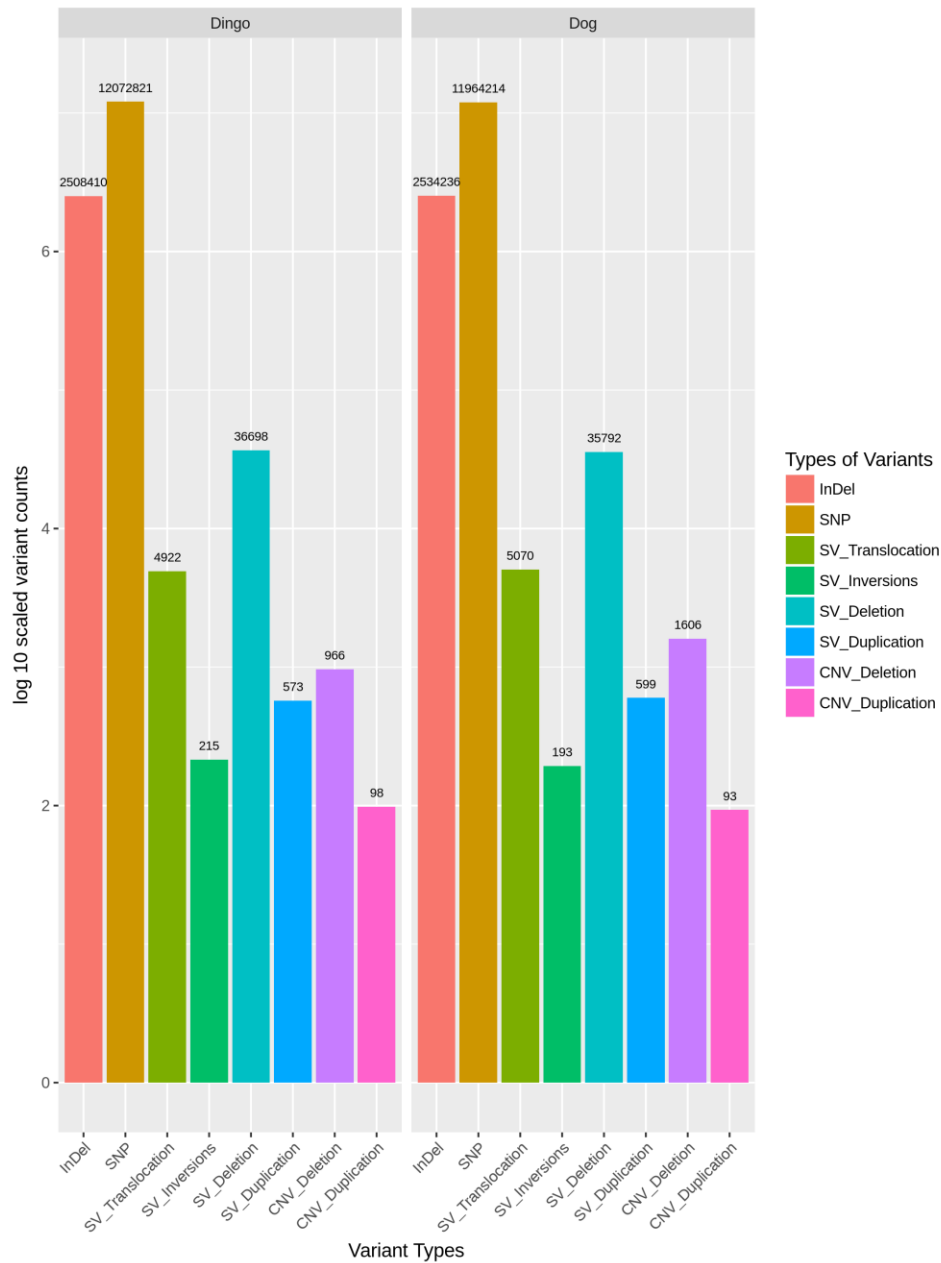

220

221 *Figure 1: Frequency of structural variants in dhole using reference genomes of dingo and*

222 *domestic dogs.*

223 ***SSRs in dhole based on domestic dog***

224 Based on high quality SNPs and indels derived from filtering the FreeBayes emitted VCF, we

225 created a consensus genome. We observed that 3.04% of the genomic length were part of

226 SSRs in case of PERF whereas 3.65% was reported in case of MISA, with most of the

227 contribution arising from hexa and tetra nucleotide SSRs (based on  $\sum(\text{Length}$

228 SSRs)\*100/genome length). We observed a concordant 1854109 SSRs from 4692222 PERF  
229 predicted SSRs and 2813199 MISA predicted SSRs (Figure 2 & 3).

230

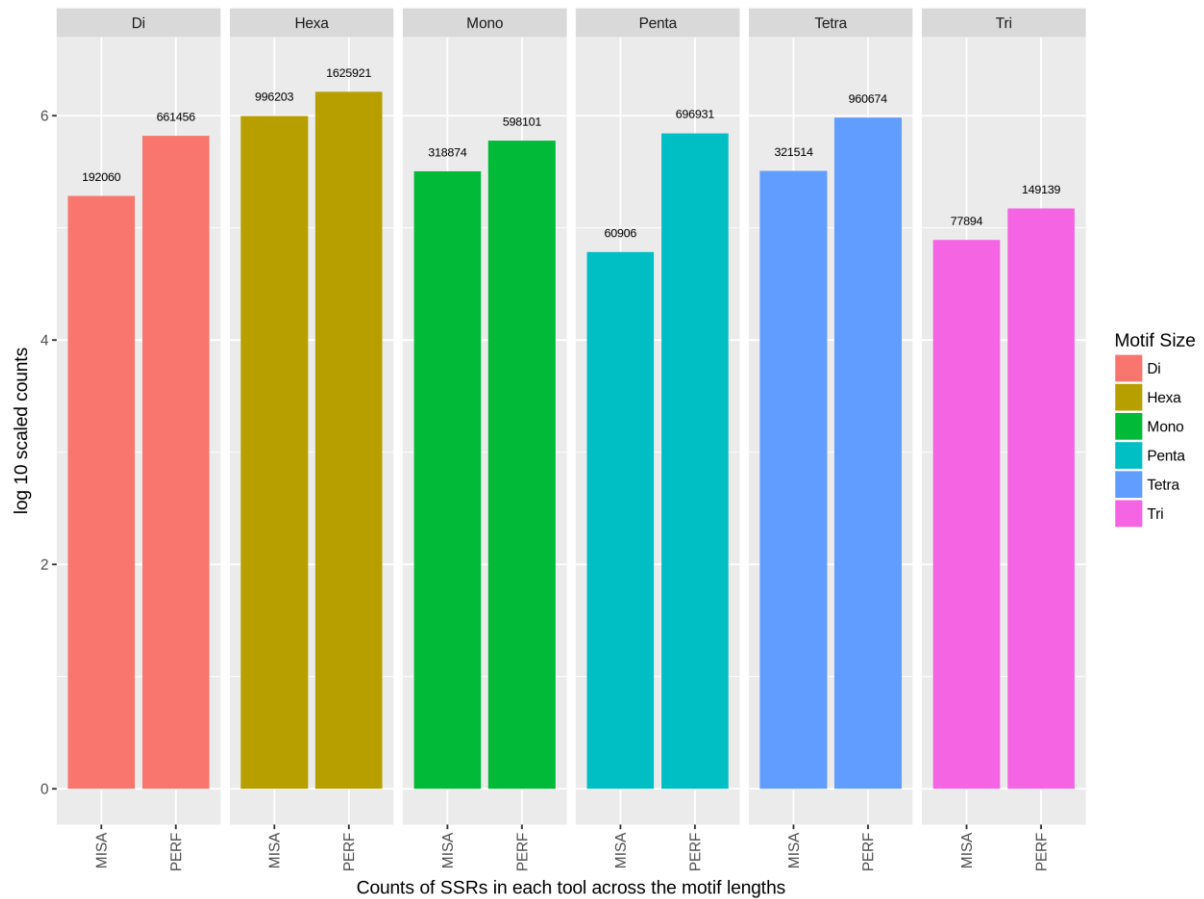

231

232

233 *Figure 2: Distribution of SSR frequencies predicted using PERF*

234

235

236

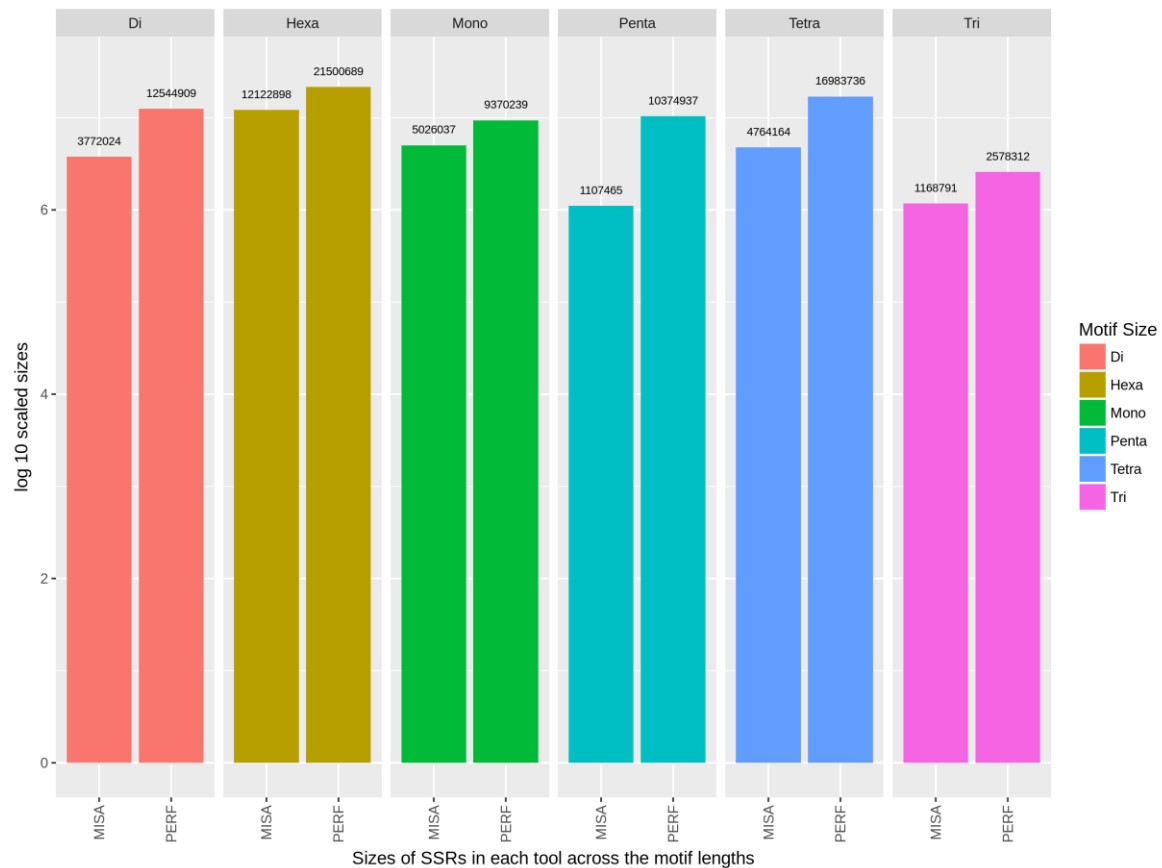

237

238 *Figure 3: Distribution of SSR frequencies predicted using MISA*

### 239 ***Mitochondrial Genome Assembly***

240 The baited sequences originating from the mitochondrial genomes of the canids were used to  
241 assemble the mitochondrial genome of Dhole into 37 scaffolds using SPAdes using the native  
242 multi-kmer approach. 36 scaffolds from the assembly had a sum length of 19,485 bases with  
243 a mean depth of 1.32x with the smallest scaffolds being 280 bases long. The GFA format pf  
244 the assembly was visualized using Bandage v0\_8\_1 (Wick et al. 2015), corroborated the  
245 same with the longest scaffold being circular having a depth of ~105.3x with a length of  
246 16845 bases. The other 36 sequences were discarded and the circularized scaffold was  
247 annotated using Prokka v1.14-dev (Seemann 2014) using the Mitochondrial mode complying  
248 with GenBank recommendations. Annotation of the longest scaffold resulted in the prediction  
249 of 35 genes, 11 CDS and 24 tRNA.

250 *Variations in pelage, dentition and mammary gland related genes*

251 We looked at the SNP variants in upstream region of genes coding for coat pattern, dentition  
 252 and mammary glands. We selected the positively selected genes having higher ratio of non-  
 253 synonymous vs synonymous mutations for further analysis. The top 50 upstream gene  
 254 variants having SNPs were arranged in decreasing order for dhole vs. dingo and dhole vs.  
 255 dog. The top ranked genes for coat pattern, dentition and mammary glands were found to  
 256 play a role in signalling and developmental pathways. It is also important to compare the  
 257 positively selected genes for the three traits with African wild dog being the first diverged  
 258 genus before Cuon which will be a future work. (Figure 4,5,6).

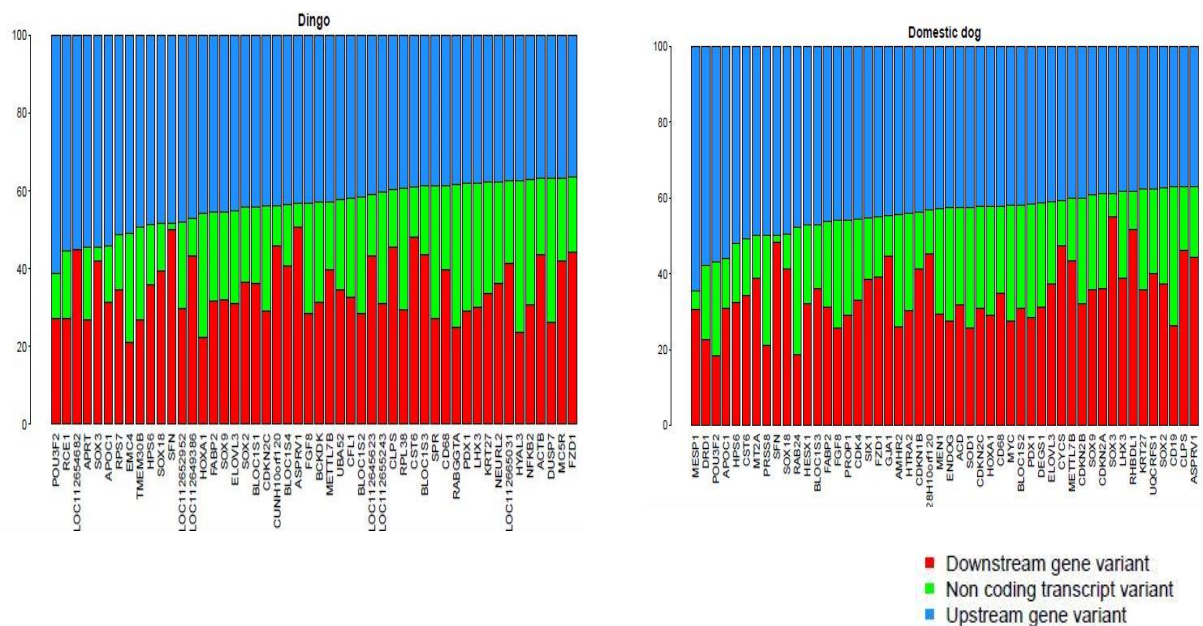

259  
 260 *Figure 4: Percentage of variants distributed in upstream, non-coding and downstream*  
 261 *regions of coat pattern genes*

262  
 263  
 264  
 265  
 266



267

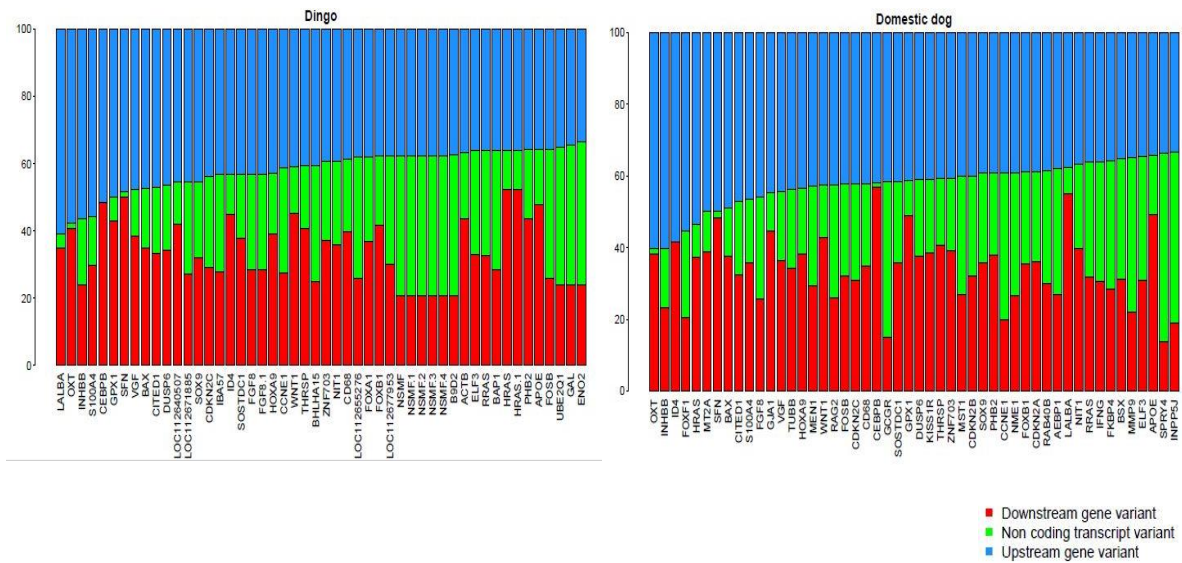

268

269 *Figure 5: Percentage of variants distributed in upstream, non-coding and downstream*  
 270 *regions mammary gland genes*

271

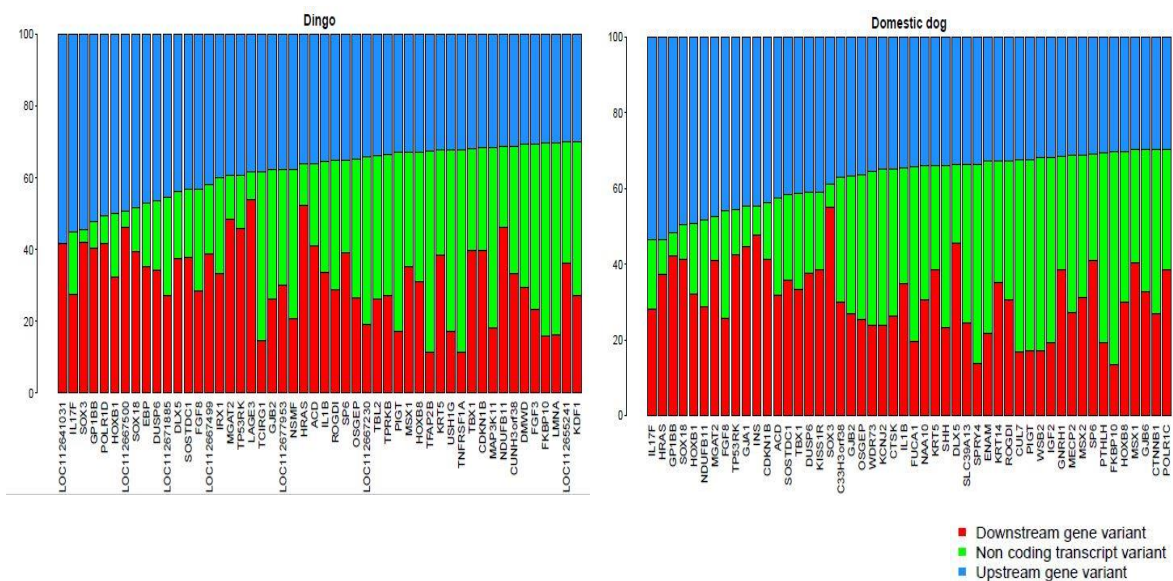

272

273 *Figure 6: Percentage of variants distributed in upstream, non-coding and downstream*  
 274 *regions dentition genes*

275

276 We also considered nine different genes involved in pathways for melanin formation (ASIP,  
 277 MC1R, MLPH, MITF, PMEL, TYRP1) and hair growth and patterns (FGF5, KRT71,

278 RSPO2) (Campana et al. 2016) to understand the variations in dholes coat pattern and their  
 279 expression in comparison to the Dingo and domestic Dog. The gene DEFB103A is absent  
 280 both Dingo and domestic Dog. We found that genes like MITF (responsible for white  
 281 spotting phenotypes in dog and coat colour variants), PMEL (responsible for merle pattern)  
 282 and ASIP (responsible for darker and lighter hair colours) are not showing any evident  
 283 variation in exon regions and showing most of the variation in upstream promoter region and  
 284 downstream regions and non-coding regions.

285 While in case of MC1R gene, it is highly polymorphic in upstream promoter and downstream  
 286 regions. The polymorphisms could reduce the ability of the melanocortin 1 receptor to  
 287 stimulate eumelanin production, causing melanocytes to make mostly pheomelanin which  
 288 supports the fact that Asiatic wild dog has red coat colour. (Figure 7)

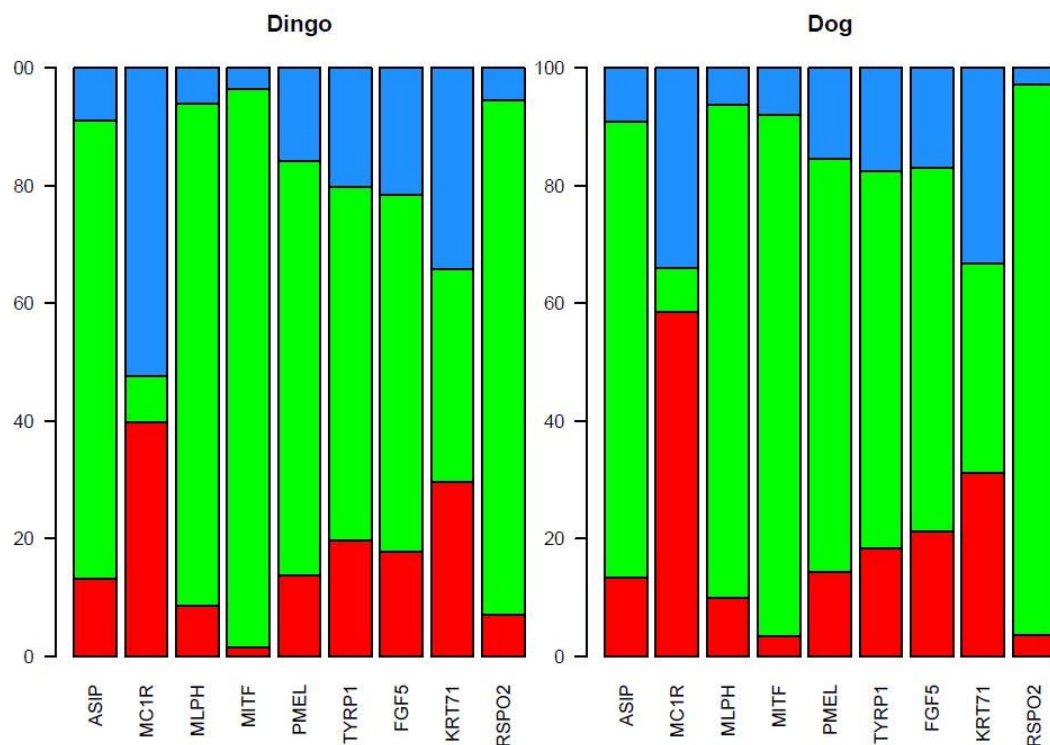

289  
 290 *Figure 7: Percentage of variants distributed in upstream, non-coding and downstream*  
 291 *regions known genes of coat pattern*

292

## 293 **Conclusion**

294 This is the first reported genomic study of the elusive, social Asiatic wild dog with an  
295 exploratory comparison with related canids dingo, African wild dog and domestic dog. This  
296 research yielded a draft genome survey of 2.4 Gb with 52X coverage basing on the domestic  
297 dog genome. This work is mainly focused on identification of structural variants, copy  
298 number variants, simple sequence repeats and single nucleotide polymorphisms and its  
299 comparison with other canid species to develop an evolutionary insight for this monophyletic  
300 genus. This will also help in understanding the divergence of two monophyletic genomes  
301 *Cuon* and *Lycaon* during the course of evolution and differences arose in Dhole as compared  
302 to other canids in the form of coat pattern, dentition and mammary glands.

## 303 **Acknowledgement**

304 This research is a collaborative work between Wildlife Institute of India and Nucleome  
305 Informatics Private Limited. The authors acknowledge the support from Maharashtra State  
306 Forest Department for the permits to conduct this work. We thank the forest department  
307 officials, staff and our field assistants Roshan and Akshay for their assistance in fieldwork  
308 during dhole capture and blood sampling. Our sincere thanks to the Dean, Faculty of Wildlife  
309 Sciences, Director and Research Co-ordinator of WII for their support. This research was  
310 funded by Maharashtra State Forest Department and National Tiger Conservation Authority,  
311 Government of India.

312

## 313 **Conflict of Interest**

314 The authors declare that they have no conflict of interest.

315

316 **References**

- 317 Abyzov, A., Urban, A. E., Snyder, M., & Gerstein, M. (2011). CNVnator: An approach to  
318 discover, genotype and characterize typical and atypical CNVs from family and  
319 population genome sequencing. *Genome research*, gr-114876.
- 320 Altenhoff, A. M., Glover, N. M., Train, C. M., Kaleb, K., Warwick Vesztröcy, A., Dylus, de  
321 Farias, T.M., Zile, K., Stevenson, C., Long, J., Redestig, H., Gonnet, G.H. &  
322 Dessimoz, C. (2017). The OMA orthology database in 2018: retrieving evolutionary  
323 relationships among all domains of life through richer web and programmatic  
324 interfaces. *Nucleic acids research*, 46(D1), D477-D485.
- 325 Avvaru, A. K., Sowpati, D. T., & Mishra, R. K. (2017). PERF: an exhaustive algorithm for  
326 ultra-fast and efficient identification of microsatellites from large DNA  
327 sequences. *Bioinformatics*, 34(6), 943-948.
- 328 Bankevich, A., Nurk, S., Antipov, D., Gurevich, A. A., Dvorkin, M., Kulikov, A. S., ... &  
329 Pyshkin, A. V. (2012). SPAdes: a new genome assembly algorithm and its  
330 applications to single-cell sequencing. *Journal of computational biology*, 19(5), 455-  
331 477.
- 332 Bashir, T., Bhattacharya, T., Poudyal, K., Roy, M. and Sathyakumar, S. 2014. Precarious  
333 status of the Endangered dhole *Cuon alpinus* in the high elevation Eastern Himalayan  
334 habitats of Khangchendzonga Biosphere Reserve, Sikkim, India. *Oryx* 48(1): 125-  
335 132.
- 336 Bello, S. M., Smith, C. L., & Eppig, J. T. (2015). Allele, phenotype and disease data at  
337 Mouse Genome Informatics: improving access and analysis. *Mammalian*  
338 *Genome*, 26(7-8), 285-294.
- 339 Bolger AM, Lohse M, Usadel B. 2014. Trimmomatic: a flexible trimmer for Illumina  
340 sequence data. *Bioinformatics*30:2114–2120.

- 341 Burton, R.W. 1940. The Indian wild dog. *Journal of the Bombay Natural History Society* 41:  
342 691-715.
- 343 Cohen, J.A., Fox, M.W., Johnsingh, A.J.T. and Barnett, B.D.1978. Food habits of the Dhole  
344 in South India. *The Journal of Wildlife Management* 42(4): 933-936.
- 345 Durbin, L.S., Venkataraman, A., Hedges, S. and Duckworth, W. 2004. Dhole *Cuon alpinus*.  
346 In: C. Sillero-Zubiri, M. Hoffmann and D.W. Macdonald (eds), *Candidids: Foxes,*  
347 *wolves, jackals and dogs. Status survey and conservation action plan*, IUCN/SSC  
348 Canid Specialist Group, Gland, Switzerland and Cambridge, UK
- 349 Faust, G. G., & Hall, I. M. (2014). SAMBLASTER: fast duplicate marking and structural  
350 variant read extraction. *Bioinformatics*, 30(17),2503-2505.
- 351 Fox, M.W. (1984) *The Whistling Hunters: The field studies of Asiatic Wild Dog*  
352 *(Cuonalpinus)*, State University of New York Press, New York.
- 353 Garrison, E., & Marth, G. (2012). Haplotype-based variant detection from short-read  
354 sequencing. *arXiv preprint arXiv:1207.3907*.
- 355 Ghaskadbi, P., Habib, B., & Qureshi, Q. (2016). A whistle in the woods: an ethogram and  
356 activity budget for the dhole in central India. *Journal of Mammalogy*, 97(6), 1745-  
357 1752.
- 358 Jernvall, J., & Thesleff, I. (2012). Tooth shape formation and tooth renewal: evolving with  
359 the same signals. *Development*, 139(19), 3487-3497.
- 360 Kamler, J.F., Songsasen, N., Jenks, K., Srivathsa, A., Sheng, L. & Kunkel, K. 2015. *Cuon*  
361 *alpinus*. The IUCN Red List of Threatened Species 2015: e.T5953A72477893.
- 362 Karanth, K.K., Nichols, J.D., Hines, J.E., Karanth, K.U. and Christensen, N.L. 2009. Patterns  
363 and determinants of mammal species occurrence in India. *Journal of Applied Ecology*  
364 46(6): 1189-1200.

- 365 Karanth, K.K., Nichols, J.D., Karanth, K.U., Hines, J.E. and Christensen, N.L. 2010. The  
366 shrinking ark: patterns of large mammal extinctions in India. *Proceedings of the*  
367 *Royal Society of London, B 277: 1971-1979* 277:: 1971-1979.
- 368 Karanth, K.U. and Sunquist, M.E. 2000. Behavioural correlates of predation by tiger  
369 (*Panthera tigris*), leopard (*Panthera pardus*) and dhole (*Cuon alpinus*) in Nagarahole,  
370 India. *Journal of Zoology* 250: 255-265
- 371 Layer, R. M., Chiang, C., Quinlan, A. R., & Hall, I. M. (2014). LUMPY: a probabilistic  
372 framework for structural variant discovery. *Genome biology*, 15(6), R84.
- 373 Li, H. (2014). Toward better understanding of artifacts in variant calling from high-coverage  
374 samples. *Bioinformatics*, 30(20), 2843-2851.
- 375 Li, H., & Durbin, R. (2010). Fast and accurate long-read alignment with Burrows–Wheeler  
376 transform. *Bioinformatics*, 26(5),589-595.
- 377 Lindblad-Toh, K., *et al.*. 2005. Genome sequence, comparative analysis and haplotype  
378 structure of the domestic dog. *Nature* 438: 803-819.
- 379 Lyngdoh, S., Gopi, G.V., Selvan, K.M. and Habib, B. 2014. Effect of interactions among  
380 ethnic communities, livestock and wild dogs (*Cuon alpinus*) in Arunachal Pradesh,  
381 India. *Journal of Wildlife Research* 60(5): 771-780.
- 382 Nguyen, H., & Lavenier, D. (2009). PLAST: parallel local alignment search tool for database  
383 comparison. *BMC bioinformatics*, 10(1), 329.
- 384 O'Leary, N. A., Wright, M. W., Brister, J. R., Ciuffo, S., Haddad, D., McVeigh, R., ... &  
385 Astashyn, A. (2015). Reference sequence (RefSeq) database at NCBI: current status,  
386 taxonomic expansion, and functional annotation. *Nucleic acids research*, 44(D1),  
387 D733-D745.



- 388 Robinson, P. N., Köhler, S., Bauer, S., Seelow, D., Horn, D., & Mundlos, S. (2008). The  
389 Human Phenotype Ontology: a tool for annotating and analyzing human hereditary  
390 disease. *The American Journal of Human Genetics*, 83(5), 610-615.
- 391 Savvas, I., Plevraki, K., Raptopoulos, D., & Koutinas, A. F. (2005). Blood gas and acid–base  
392 status during tiletamine/zolazepam anaesthesia in dogs. *Veterinary anaesthesia and  
393 analgesia*, 32(2), 94-100.
- 394 Seemann, T. (2014). Prokka: rapid prokaryotic genome annotation. *Bioinformatics*, 30(14),  
395 2068-2069.
- 396 Steinmetz, R., Seuaturien, N. and Chutipong, W. 2013. Tigers, leopards, and dholes in a half-  
397 empty forest: Assessing species interactions in a guild of threatened  
398 carnivores. *Biological Conservation* 163: 68–78.
- 399 Subramanian, S., Mishra, R. K., & Singh, L. (2003). Genome-wide analysis of microsatellite  
400 repeats in humans: their abundance and density in specific genomic regions. *Genome  
401 biology*, 4(2), 1.
- 402 Tarasov, A., Vilella, A. J., Cuppen, E., Nijman, I. J., & Prins, P. (2015). Sambamba: fast  
403 processing of NGS alignment formats. *Bioinformatics*, 31(12), 2032-2034.
- 404 Tattini, L., D’Aurizio, R., & Magi, A. (2015). Detection of genomic structural variants from  
405 next-generation sequencing data. *Frontiers in bioengineering and biotechnology*, 3,  
406 92.
- 407 Van Valkenburgh B. 1991. Iterative evolution of hypercarnivory in canids (Mammalia:  
408 Carnivora): evolutionary interactions among sympatric predator. *Paleobiology* 17:  
409 340–362
- 410 Wang, S.W. & Macdonald, D.W. (2006). Livestock predation by carnivores in Jigme Singye  
411 Wangchuck National Park, Bhutan. *Biological Conservation*, 129, 558–565.

- 412 Wayne, R.K., Geffen, E., Girman, D.J., Koepfli, K.P., Lau, L.M. and Marshall, C. (1997)  
413 Molecular systematics of the Canidae. *Systematic Biology* 4, 622-653.
- 414 Wick, R. R., Schultz, M. B., Zobel, J., & Holt, K. E. (2015). Bandage: interactive  
415 visualization of de novo genome assemblies. *Bioinformatics*, 31(20), 3350-3352.
- 416 Zerbino, D. R., Achuthan, P., Akanni, W., Amode, M. R., Barrell, D., Bhai, J., Billis, K.,  
417 Cummins, C., Gall. A., Giron, C. G.& Gil, L. (2017). Ensembl 2018. *Nucleic acids*  
418 *research*, 46(D1), D754-D761.
